# Supplementary material
Source: PubMed Central journal article supplement (PMC6187108)
Supplement: zsy150_suppl_supplemental_materials.pdf [file zsy150_suppl_supplemental_materials.pdf]

## **Supplemental Materials**

### **Weekly Sleep Trajectories and their Associations with Obesity and Hypertension in the Hispanic/ Latino Population.**

Jinsong Chen<sup>1</sup>, PhD; Sanjay R. Patel<sup>2</sup>, MD; Susan Redline<sup>3</sup>, MD; Ramon Durazo-Arvizu<sup>1</sup>, PhD; Daniel B. Garside<sup>1</sup>, BS; Kathryn J Reid<sup>4</sup>, MD; James Lash<sup>1</sup>, MD; Daniela Sotres-Alvarez<sup>5</sup>, DrPH; Linda C Gallo<sup>6</sup>, PhD; Megan E Petrov<sup>7</sup>, MD; Krista M Perreira<sup>5</sup>, PhD; Gregory A Talavera<sup>6</sup>, MD; Alberto R Ramos<sup>8</sup>, MD; Phyllis Zee<sup>4</sup>, MD; Martha L. Daviglus<sup>1</sup>, MD.

<sup>1</sup>University of Illinois at Chicago, <sup>2</sup>University of Pittsburg, <sup>3</sup>Harvard Medical School, <sup>4</sup>Northwestern University, <sup>5</sup>University of North Carolina at Chapel Hill, <sup>6</sup>San Diego State University, <sup>7</sup>Arizona State University, <sup>8</sup>University of Miami.

Correspondence to: Jinsong Chen, PhD, College of Applied Health Sciences/College of Medicine, University of Illinois at Chicago, 1919 W Taylor St, Chicago, IL 60612, U.S.A. E-mail [jinsongc@uic.edu](mailto:jinsongc@uic.edu)

## Background for Intranight Instability Index

We proposed to use intranight instability index as a daily level measure to describe the nightly sleep pattern based on both theoretical derivation and data evidence. The pattern of activity during sleep is unique in that an individual aims to sleep but not active. This scenario results in excessive epochs with zero activity count during sleep. It is natural to use zero-inflated Poisson distribution to model the sleep activity count data. Let  $p_0$  be the probability of extra zeros, then mean divided by standard deviation (SD) of zero-inflated Poisson distribution is:

$$\frac{Mean}{SD} = \sqrt{\frac{Mean}{1 + \frac{p_0}{1 - p_0} Mean}} \quad (S1)$$

We created intranight instability index (mean of activity count in a sleep interval divided by SD of activity count in the same interval) because expression (S1) indicates intranight instability index increase with the increasing of mean activity or the decreasing of  $p_0$ . This is observed by the scatterplots for daily Sueño actigraphy data in Supplemental Figure 1. Larger  $p_0$  imply larger sleep efficiency or smaller WASO since a wake threshold activity count of 40 is used to generate sleep/wake status for each epoch in existing actigraphy methods. This also suggests that there might be important health information in the number of epochs with activity count of 0. Our findings support using intranight instability index as a marker of sleep quality. This is evidenced by the linear concordance between intranight instability index and sleep measures including sleep onset latency, WASO, sleep efficiency, wake bouts, and sleep fragmentation index shown in Supplemental Table 1.

As shown in Supplemental Table 2, the stronger associations of intranight instability index with both obesity and hypertension imply intranight instability index provides comprehensive information beyond that in most other single sleep measure. In brief, although it has not been used previously, the results from our study support its use as a marker to describe the activity pattern during the sleep interval.

## **Latent Class Growth Model using Proc Traj**

Since approximating 75% of observed value is zero, we use zero-inflated Poisson model for daytime napping duration. The truncated normal model is used for WASO and intranight instability index. Starting with quadratic form for trajectory, we examine models with 5 classes, then compare the Bayesian Information Criterion (BIC) to those with 4, 3, 2, and 1 classes respectively.<sup>1</sup> Supplemental Table 3 shows the BIC values for various sleep measures conditioning on different number of classes. Models with smaller BIC are preferred. Based on BIC values only, the selected number of classes is 5, 4, and 5 for WASO, napping duration, and intranight instability index in sleep interval respectively. However, we choose the number of classes as 4 for intranight instability index since BIC values increase less than 1% from 4 classes to 5 classes. Once identifying the number of classes needed, we compare model fit with different functional form (e.g., linear, quadratic, cubic). The final model is the optimal one with optimal classes and trajectory functional forms. From this final model, we calculate the posterior predicted probability for each individuals of being a member in each of classes. Supplemental Table 4 shows the mean posterior probabilities for each class. It can be seen that the mean posterior probabilities exceed suggested threshold of 0.7.<sup>2</sup> We notice that the mean posterior probability is 0.86 when choose 5 classes for intranight instability index in sleep interval, which is just slightly smaller than 0.87 for 4 classes. This suggests that the selection of 4 classes is superior to that of 5 classes.

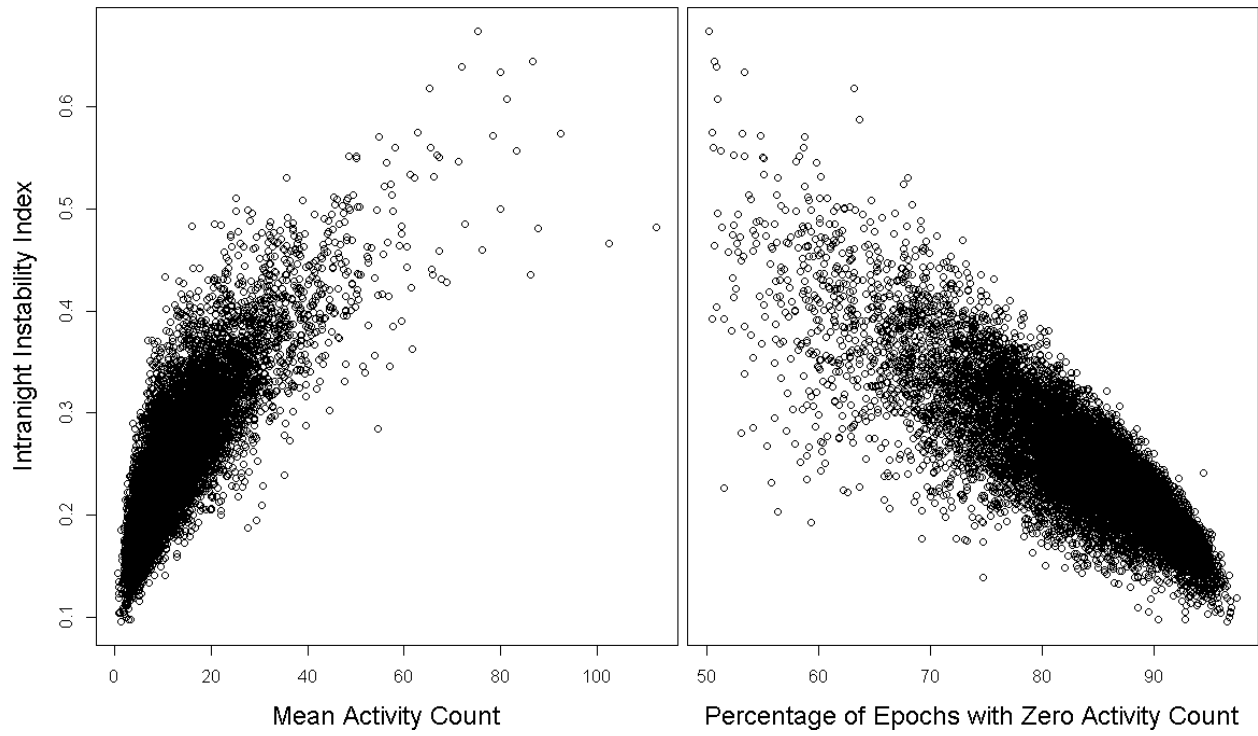

**Supplemental Figure 1:** Scatterplot of Intranight Instability Index Depending on Daily Mean Activity and Percentage of Epochs with Zero Activity Count for Sueño Actigraphy Data.

**Supplemental Table 1: Characteristics by Weekly Trajectory Classes.**

| Variables                           | Trajectory Classes for WASO       |                                        |                                    |                                   |                                     | Trajectory Classes for Daytime Napping Duration |                                   |                                   |                                     | Trajectory Classes for Intranight Instability Index |                                 |                             |                                        |
|-------------------------------------|-----------------------------------|----------------------------------------|------------------------------------|-----------------------------------|-------------------------------------|-------------------------------------------------|-----------------------------------|-----------------------------------|-------------------------------------|-----------------------------------------------------|---------------------------------|-----------------------------|----------------------------------------|
|                                     | Low-stable<br>Mean or % (95 % CI) | Moderate-stable<br>Mean or % (95 % CI) | High-stable<br>Mean or % (95 % CI) | Increasing<br>Mean or % (95 % CI) | High-concave<br>Mean or % (95 % CI) | Low<br>Mean or % (95 % CI)                      | Increasing<br>Mean or % (95 % CI) | Decreasing<br>Mean or % (95 % CI) | High-concave<br>Mean or % (95 % CI) | Low<br>Mean or % (95 % CI)                          | Moderate<br>Mean or % (95 % CI) | High<br>Mean or % (95 % CI) | Highly Variable<br>Mean or % (95 % CI) |
| <b>Sueño Sleep (Average)</b>        |                                   |                                        |                                    |                                   |                                     |                                                 |                                   |                                   |                                     |                                                     |                                 |                             |                                        |
| Duration Sleep (hours)              | 7.28<br>(7.2,7.4)                 | 7.94<br>(7.8,8.1)                      | 8.39<br>(8.0,8.7)                  | 7.88<br>(7.3,8.5)                 | 8.12<br>(7.2,9.1)                   | 7.70<br>(7.6,7.8)                               | 7.44<br>(7.2,7.7)                 | 7.62<br>(7.4,7.8)                 | 6.77<br>(6.5,7.1)                   | 7.53<br>(7.4,7.6)                                   | 7.65<br>(7.5,7.8)               | 7.75<br>(7.5,8.0)           | 7.25<br>(6.7,7.8)                      |
| Sleep Onset Latency                 | 8.44<br>(7.9,8.9)                 | 13.39<br>(12.2,14.6)                   | 18.70<br>(13.8,23.6)               | 12.83<br>(7.2,18.5)               | 31.30<br>(7.8,54.8)                 | 11.94<br>(10.9,13.0)                            | 8.85<br>(7.6,10.1)                | 10.11<br>(8.6,11.6)               | 10.00<br>(7.7,12.3)                 | 6.62<br>(6.2,7.0)                                   | 10.53<br>(9.9,11.2)             | 16.97<br>(14.4,19.6)        | 28.36<br>(21.1,35.6)                   |
| WASO                                | 37.75<br>(36.9,38.6)              | 66.96<br>(65.9,68.0)                   | 103.83<br>(100.1,107.6)            | 86.29<br>(76.2,96.4)              | 144.13<br>(130.6,157.6)             | 54.84<br>(52.7,56.9)                            | 52.45<br>(45.9,59.0)              | 54.60<br>(51.7,57.5)              | 52.13<br>(45.2,59.1)                | 34.88<br>(33.8,36.0)                                | 55.28<br>(53.7,56.9)            | 79.09<br>(75.5,82.7)        | 101.60<br>(91.4,111.8)                 |
| Sleep Efficiency                    | 88.81<br>(88.5,89.1)              | 82.38<br>(81.8,83.0)                   | 75.50<br>(74.3,76.7)               | 78.87<br>(76.5,81.3)              | 65.68<br>(59.9,71.4)                | 85.17<br>(84.6,85.7)                            | 85.68<br>(84.0,87.4)              | 85.59<br>(84.8,86.4)              | 84.47<br>(82.7,86.2)                | 90.41<br>(90.2,90.6)                                | 85.28<br>(85.0,85.6)            | 78.66<br>(77.7,79.6)        | 71.16<br>(69.5,72.8)                   |
| Sleep Fragmentation                 | 17.35<br>(17.0,17.7)              | 25.32<br>(24.6,26.0)                   | 33.93<br>(32.6,35.2)               | 32.37<br>(28.4,36.3)              | 42.80<br>(37.5,48.2)                | 21.79<br>(21.1,22.4)                            | 20.70<br>(18.5,22.9)              | 21.83<br>(20.8,22.9)              | 22.47<br>(20.3,24.6)                | 15.55<br>(15.2,15.9)                                | 22.20<br>(21.8,22.6)            | 29.05<br>(27.8,30.3)        | 37.13<br>(35.0,39.2)                   |
| Sleep Interval Midpoint             | 4.01<br>(3.9,4.2)                 | 4.24<br>(4.1,4.4)                      | 4.25<br>(3.8,4.7)                  | 4.11<br>(3.4,4.8)                 | 4.97<br>(3.8,6.1)                   | 4.18<br>(4.0,4.3)                               | 3.62<br>(3.2,4.0)                 | 3.94<br>(3.8,4.1)                 | 4.61<br>(4.0,5.2)                   | 3.95<br>(3.8,4.1)                                   | 4.17<br>(4.0,4.3)               | 4.17<br>(3.9,4.5)           | 4.56<br>(4.2,5.0)                      |
| Daytime Nap Duration (mins)         | 15.07<br>(12.9,17.2)              | 10.43<br>(8.2,12.6)                    | 17.42<br>(10.3,24.6)               | 11.89<br>(2.1,21.7)               | 14.37<br>(4.7,24.0)                 | 1.65<br>(1.4,1.9)                               | 25.47<br>(22.6,28.4)              | 23.90<br>(22.4,25.4)              | 79.67<br>(72.1,87.3)                | 14.36<br>(12.3,16.4)                                | 12.84<br>(10.6,15.1)            | 14.64<br>(10.0,19.3)        | 13.93<br>(7.2,20.6)                    |
| Mean of Activity in Sleep Intervals | 9.63<br>(9.2,10.1)                | 15.28<br>(14.4,16.2)                   | 23.79<br>(20.7,26.8)               | 20.00<br>(16.0,24.0)              | 43.96<br>(24.1,63.8)                | 12.96<br>(12.2,13.7)                            | 14.10<br>(10.2,18.0)              | 13.06<br>(11.7,14.5)              | 14.35<br>(12.1,16.6)                | 8.03<br>(7.7,8.4)                                   | 12.57<br>(12.1,13.1)            | 19.70<br>(18.0,21.4)        | 31.18<br>(26.0,36.4)                   |
| SD of Activity in Sleep Intervals   | 40.15<br>(39.1,41.2)              | 52.26<br>(50.7,53.8)                   | 64.62<br>(61.2,68.0)               | 55.90<br>(48.8,63.0)              | 83.93<br>(65.1,102.8)               | 46.51<br>(45.3,47.8)                            | 46.95<br>(42.0,51.9)              | 46.73<br>(44.7,48.7)              | 48.96<br>(44.3,53.6)                | 37.61<br>(36.5,38.7)                                | 47.12<br>(46.0,48.2)            | 57.55<br>(55.0,60.1)        | 70.94<br>(65.0,76.9)                   |
| Intranight Instability Index        | 0.23<br>(0.2,0.2)                 | 0.28<br>(0.3,0.3)                      | 0.34<br>(0.3,0.4)                  | 0.32<br>(0.3,0.3)                 | 0.43<br>(0.4,0.5)                   | 0.25<br>(0.2,0.3)                               | 0.27<br>(0.2,0.3)                 | 0.25<br>(0.2,0.3)                 | 0.27<br>(0.2,0.3)                   | 0.21<br>(0.2,0.2)                                   | 0.25<br>(0.3,0.3)               | 0.32<br>(0.3,0.3)           | 0.39<br>(0.4,0.4)                      |
| <b>Demographic and Clinic</b>       |                                   |                                        |                                    |                                   |                                     |                                                 |                                   |                                   |                                     |                                                     |                                 |                             |                                        |
| Age                                 | 41.37<br>(40.3,42.4)              | 40.20<br>(38.8,41.6)                   | 39.71<br>(36.4,43.0)               | 40.96<br>(34.5,47.4)              | 39.18<br>(31.3,47.1)                | 40.77<br>(39.7,41.8)                            | 40.54<br>(37.5,43.6)              | 41.56<br>(39.9,43.2)              | 39.33<br>(35.8,42.9)                | 41.55<br>(40.2,42.9)                                | 40.34<br>(39.0,41.6)            | 40.70<br>(38.6,42.8)        | 40.58<br>(37.3,43.9)                   |
| Male                                | 42.41<br>(38.5,46.3)              | 50.62<br>(44.7,56.5)                   | 63.43<br>(53.5,73.4)               | 62.93<br>(39.1,86.8)              | 90.57<br>(80.9,100.0)               | 47.90<br>(44.0,51.8)                            | 47.64<br>(35.6,59.7)              | 44.58<br>(38.4,50.7)              | 55.33<br>(43.7,66.9)                | 35.61<br>(31.0,40.2)                                | 48.61<br>(43.9,53.4)            | 60.77<br>(53.5,68.0)        | 78.45<br>(68.4,88.5)                   |
| Background                          |                                   |                                        |                                    |                                   |                                     |                                                 |                                   |                                   |                                     |                                                     |                                 |                             |                                        |
| Mexican                             | 39.14<br>(33.6,44.7)              | 33.48<br>(27.6,39.4)                   | 17.86<br>(8.3,27.4)                | 28.39<br>(6.1,50.7)               | 30.52<br>(0.0,62.5)                 | 36.84<br>(31.1,42.6)                            | 38.07<br>(25.6,50.5)              | 32.37<br>(25.5,39.2)              | 29.08<br>(16.5,41.7)                | 41.04<br>(34.3,47.7)                                | 35.93<br>(30.5,41.3)            | 27.34<br>(19.0,35.7)        | 17.78<br>(6.2,29.3)                    |
| DOMINICAN                           | 11.60<br>(8.6,14.6)               | 14.85<br>(10.4,19.3)                   | 16.50<br>(5.7,27.3)                | 20.56<br>(0.0,52.6)               | 2.17<br>(0.0,6.5)                   | 13.12<br>(9.6,16.6)                             | 9.97<br>(2.7,17.3)                | 11.70<br>(7.2,16.2)               | 19.95<br>(7.3,32.6)                 | 11.86<br>(8.0,15.7)                                 | 13.38<br>(9.9,16.9)             | 13.72<br>(6.9,20.5)         | 16.21<br>(4.5,27.9)                    |
| Central/South American              | 10.21<br>(7.9,12.6)               | 9.97<br>(7.2,12.8)                     | 8.89<br>(4.6,13.2)                 | 6.59<br>(0.0,13.3)                | 3.81<br>(0.0,11.4)                  | 9.42<br>(6.9,11.9)                              | 12.29<br>(6.8,17.7)               | 10.22<br>(7.0,13.4)               | 10.80<br>(5.1,16.5)                 | 9.60<br>(6.9,12.3)                                  | 10.23<br>(7.7,12.8)             | 11.55<br>(7.9,15.2)         | 4.86<br>(1.6,8.1)                      |
| CUBAN                               | 23.00<br>(17.5,28.5)              | 17.09<br>(12.1,22.1)                   | 24.61<br>(15.2,34.1)               | 27.05<br>(7.5,46.6)               | 16.36<br>(0.0,34.5)                 | 20.65<br>(15.1,26.2)                            | 18.52<br>(8.2,28.9)               | 22.76<br>(16.9,28.7)              | 24.03<br>(12.2,35.8)                | 21.26<br>(15.5,27.0)                                | 21.15<br>(16.1,26.1)            | 20.48<br>(12.0,28.9)        | 23.58<br>(10.7,36.4)                   |

|                     |                      |                      |                      |                      |                      |                      |                      |                      |                      |                      |                      |                      |                      |
|---------------------|----------------------|----------------------|----------------------|----------------------|----------------------|----------------------|----------------------|----------------------|----------------------|----------------------|----------------------|----------------------|----------------------|
| Puerto Rican        | 16.05<br>(12.4,19.7) | 24.61<br>(18.4,30.9) | 32.13<br>(20.2,44.1) | 17.41<br>(1.8,33.0)  | 47.14<br>(18.4,75.9) | 19.96<br>(16.1,23.8) | 21.14<br>(9.4,32.9)  | 22.95<br>(16.8,29.1) | 16.15<br>(8.3,24.0)  | 16.25<br>(12.0,20.5) | 19.31<br>(14.9,23.7) | 26.91<br>(18.6,35.2) | 37.57<br>(23.4,51.8) |
| Employment          |                      |                      |                      |                      |                      |                      |                      |                      |                      |                      |                      |                      |                      |
| Not Employed        | 47.23<br>(43.2,51.3) | 51.91<br>(46.3,57.5) | 65.97<br>(55.7,76.3) | 42.39<br>(17.7,67.1) | 48.09<br>(19.0,77.2) | 50.93<br>(47.1,54.8) | 39.74<br>(27.5,52.0) | 49.32<br>(42.8,55.9) | 55.63<br>(43.5,67.7) | 50.43<br>(45.2,55.6) | 48.41<br>(43.8,53.0) | 54.13<br>(45.4,62.8) | 50.97<br>(37.3,64.6) |
| Part-time Shift     | 12.49<br>(9.6,15.4)  | 10.48<br>(6.5,14.4)  | 10.96<br>(3.4,18.5)  | 8.77<br>(0.0,19.2)   | 6.78<br>(0.0,15.0)   | 10.80<br>(8.2,13.4)  | 8.71<br>(1.8,15.6)   | 12.45<br>(8.4,16.5)  | 18.83<br>(7.5,30.2)  | 11.61<br>(8.1,15.2)  | 11.72<br>(8.5,15.0)  | 13.79<br>(7.3,20.2)  | 4.83<br>(0.0,11.5)   |
| Part-time Non-Shift | 7.72<br>(5.8,9.7)    | 5.69<br>(2.9,8.4)    | 1.22<br>(0.0,2.9)    | 22.37<br>(0.0,54.1)  | ----                 | 6.72<br>(4.6,8.8)    | 4.59<br>(1.3,7.8)    | 8.13<br>(4.7,11.5)   | 3.88<br>(0.5,7.3)    | 7.59<br>(4.9,10.2)   | 5.52<br>(3.8,7.2)    | 9.26<br>(3.0,15.5)   | 3.66<br>(0.0,8.4)    |
| Full-time Shift     | 11.95<br>(9.8,14.1)  | 15.87<br>(11.6,20.1) | 13.34<br>(7.5,19.2)  | 9.36<br>(0.0,19.1)   | 21.86<br>(0.0,48.7)  | 13.26<br>(10.9,15.7) | 16.17<br>(8.4,23.9)  | 12.99<br>(8.5,17.5)  | 13.36<br>(6.0,20.7)  | 11.74<br>(9.1,14.4)  | 14.13<br>(11.4,16.9) | 10.18<br>(6.2,14.1)  | 26.03<br>(11.9,40.2) |
| Full-time Non-Shift | 20.61<br>(17.2,24.0) | 16.06<br>(12.5,19.6) | 8.51<br>(1.0,16.0)   | 17.11<br>(2.3,31.9)  | 23.27<br>(0.0,51.8)  | 18.29<br>(15.5,21.0) | 30.79<br>(17.7,43.9) | 17.11<br>(12.8,21.4) | 8.30<br>(1.7,14.9)   | 18.62<br>(14.9,22.4) | 20.22<br>(16.8,23.7) | 12.65<br>(7.8,17.5)  | 14.51<br>(3.1,26.0)  |
| Hypertension        | 23.00<br>(20.2,25.8) | 25.89<br>(21.4,30.4) | 33.96<br>(22.5,45.4) | 30.59<br>(11.9,49.3) | 55.67<br>(26.4,84.9) | 23.34<br>(20.3,26.3) | 20.71<br>(12.2,29.2) | 28.88<br>(23.5,34.3) | 36.11<br>(23.4,48.8) | 23.43<br>(20.0,26.9) | 22.01<br>(18.5,25.5) | 35.33<br>(27.1,43.6) | 35.38<br>(20.7,50.1) |
| Obesity             | 41.44<br>(37.5,45.4) | 44.30<br>(38.3,50.3) | 43.85<br>(31.5,56.2) | 66.23<br>(45.2,87.2) | 41.61<br>(13.4,69.8) | 41.96<br>(37.9,46.0) | 45.34<br>(32.9,57.8) | 41.02<br>(34.5,47.6) | 56.41<br>(44.4,68.4) | 38.48<br>(33.5,43.5) | 42.68<br>(38.1,47.3) | 53.25<br>(45.2,61.4) | 45.39<br>(29.8,61.0) |

**Supplemental Table 2:** Associations between Average Sleep Measures and Obesity and Hypertension adjusted for age, gender, race, site, employment, and sleep duration.

| Variable                     | Response Variables     |       |                             |       |
|------------------------------|------------------------|-------|-----------------------------|-------|
|                              | Obesity<br>OR (95% CI) | p     | Hypertension<br>OR (95% CI) | p     |
| Intranight Instability Index | 1.17(1.02,1.35)        | 0.027 | 1.28(1.09,1.51)             | 0.003 |
| Sleep Duration               | 0.84(0.74,0.96)        | 0.005 | 0.96(0.81,1.14)             | 0.570 |
| Latency                      | 0.93(0.82,1.07)        | 0.201 | 0.93(0.81,1.06)             | 0.697 |
| WASO                         | 1.13(0.98,1.30)        | 0.106 | 1.31(1.10,1.57)             | 0.002 |
| Efficiency                   | 0.94(0.81,1.08)        | 0.423 | 0.80(0.67,0.96)             | 0.011 |
| Fragmentation                | 1.14(0.99,1.32)        | 0.096 | 1.27(1.08,1.50)             | 0.003 |
| Mean_activity                | 1.05(0.92,1.20)        | 0.484 | 1.24(1.04,1.47)             | 0.017 |
| SD_activity                  | 0.98(0.86,1.13)        | 0.809 | 1.15(0.98,1.35)             | 0.085 |
| Intradaily Variability       | 1.12(0.97,1.29)        | 0.127 | 1.20(1.02,1.42)             | 0.031 |

All the sleep measures are modeled using standardized z-score. The intradaily variability is calculated based on van Someren et al. (1996).<sup>3</sup>

**Supplemental Table 3:** BIC for different number of trajectory classes with quadratic form.

| Trajectory Analysis for WASO                         |           |           |           |          |
|------------------------------------------------------|-----------|-----------|-----------|----------|
|                                                      | 2 Groups  | 3 Groups  | 4 Groups  | 5 Groups |
| BIC                                                  | -10600.90 | -10162.97 | -10008.87 | -9871.61 |
| Trajectory Analysis for Daytime Napping Duration     |           |           |           |          |
|                                                      | 2 Groups  | 3 Groups  | 4 Groups  | 5 Groups |
| BIC                                                  | -7896.27  | -7780.03  | -7727.11  | -7742.36 |
| Trajectory Analysis for Intranight Instability Index |           |           |           |          |
|                                                      | 2 Groups  | 3 Groups  | 4 Groups  | 5 Groups |
| BIC                                                  | 20069.27  | 20582.14  | 20738.14  | 20805.95 |



**Supplemental Table 4:** Mean posterior probability of individuals being member of assigned classes.

| WASO                         |      |            |                 |             |                 |              |
|------------------------------|------|------------|-----------------|-------------|-----------------|--------------|
|                              | ALL  | Low-stable | Moderate-stable | High-stable | Increasing      | High-concave |
| Posterior Probability        | 0.90 | 0.93       | 0.85            | 0.89        | 0.91            | 0.99         |
| Daytime Napping Duration     |      |            |                 |             |                 |              |
|                              | ALL  | Low-stable | Increasing      | Decreasing  | High-concave    |              |
| Posterior Probability        | 0.85 | 0.89       | 0.74            | 0.77        | 0.85            |              |
| Intranight Instability Index |      |            |                 |             |                 |              |
|                              | ALL  | Low        | Moderate        | High        | Highly Variable |              |
| Posterior Probability        | 0.87 | 0.89       | 0.84            | 0.87        | 0.92            |              |

**Supplemental Table 5:** Distribution of Trajectory Classes by Employment Status.

|                                     | <b>Unemployed</b><br>N (%) | <b>Non-shift Workers</b><br>N (%) | <b>Shift Workers</b><br>N (%) | <b>P</b> | <b>P12</b> | <b>P13</b> | <b>P23</b> |
|-------------------------------------|----------------------------|-----------------------------------|-------------------------------|----------|------------|------------|------------|
| N=                                  | 997                        | 552                               | 480                           |          |            |            |            |
| <b>WASO</b>                         |                            |                                   |                               |          |            |            |            |
| Low-stable                          | 558 (56.0)                 | 378 (68.5)                        | 290 (60.4)                    | <.001    | <.001      | 0.592      | .001       |
| Moderate-stable                     | 323 (32.4)                 | 146 (26.5)                        | 138 (28.8)                    |          |            |            |            |
| High-stable                         | 87 (8.7)                   | 14 (2.5)                          | 40 (8.3)                      |          |            |            |            |
| Increasing                          | 18 (1.8)                   | 10 (1.8)                          | 7 (1.5)                       |          |            |            |            |
| High-concave                        | 11 (1.1)                   | 4 (0.7)                           | 5 (1.0)                       |          |            |            |            |
| <b>Nap</b>                          |                            |                                   |                               |          |            |            |            |
| Low-stable                          | 642 (64.4)                 | 363 (65.8)                        | 290 (60.4)                    | .001     | <.001      | .248       | .006       |
| Increasing                          | 48 (4.8)                   | 51 (9.2)                          | 34 (7.1)                      |          |            |            |            |
| Decreasing                          | 241 (24.2)                 | 122 (22.1)                        | 123 (25.6)                    |          |            |            |            |
| High-concave                        | 66 (6.6)                   | 16 (2.9)                          | 33 (6.9)                      |          |            |            |            |
| <b>Intranight Instability Index</b> |                            |                                   |                               |          |            |            |            |
| Low                                 | 348 (34.9)                 | 237 (42.9)                        | 179 (37.3)                    | .008     | .001       | .718       | .082       |
| Moderate                            | 432 (43.3)                 | 237 (42.9)                        | 207 (43.1)                    |          |            |            |            |
| High                                | 165 (16.6)                 | 62 (11.2)                         | 73 (15.2)                     |          |            |            |            |
| Highly variable                     | 52 (5.2)                   | 16 (2.9)                          | 21 (4.4)                      |          |            |            |            |

P: pvalue of chi-square test of association between trajectory classes and three category employment status; P12: pvalue of chi-square test of association between trajectory classes and two category employment status (unemployed and non-shift worker); P13: pvalue of chi-square test of association between trajectory classes and two category employment status (unemployed and shift worker); P23: pvalue of chi-square test of association between trajectory classes and employment status (non-shift and shift workers).

**Supplemental Table 6:** Power to Detect the Indicated Odds Ratio for Obesity and Hypertension by Sleep Trajectory Classes.

| WASO            | Obesity    |           | Hypertension |           | Daytime Napping Duration | Hypertension |           | Intranight Instability Index | Obesity |           | Hypertension |           |
|-----------------|------------|-----------|--------------|-----------|--------------------------|--------------|-----------|------------------------------|---------|-----------|--------------|-----------|
|                 | OR         | Power (%) | OR           | Power (%) |                          | OR           | Power (%) |                              | OR      | Power (%) | OR           | Power (%) |
| Reference       | Low-stable |           |              |           | Low-stable               |              |           | Low                          |         |           |              |           |
| Moderate-stable | 1.13       | 24        | 1.10         | 15.2      | Increasing               | 0.88         | 22        | Moderate                     | 1.30    | 83        | 1.01         | 5         |
| High-stable     | 1.25       | 25        | 1.92         | <b>96</b> | Decreasing               | 1.27         | 31        | High                         | 1.90    | <b>99</b> | 1.86         | <b>99</b> |
| Increasing      | 3.64       | <b>97</b> | 1.35         | 15        | High-concave             | 2.27         | <b>99</b> | Highly Variable              | 1.31    | 22        | 1.85         | 76        |
| High-concave    |            |           | 5.25         | <b>95</b> |                          |              |           |                              |         |           |              |           |

The indicated odds ratio is the odds ratio in tables 1 and 2.

**Supplemental Table 7:** Characteristics of Employment by WASO Trajectory Classes.

| <b>Variables</b>                                 | <b>Low-stable<br/>Mean or %<br/>(95 % CI)</b> | <b>Moderate-<br/>stable<br/>Mean or %<br/>(95 % CI)</b> | <b>High-<br/>stable<br/>Mean or %<br/>(95 % CI)</b> | <b>Increasing<br/>Mean or % (95<br/>% CI)</b> | <b>High-<br/>concave<br/>Mean or % (95<br/>% CI)</b> | <b>P</b> |
|--------------------------------------------------|-----------------------------------------------|---------------------------------------------------------|-----------------------------------------------------|-----------------------------------------------|------------------------------------------------------|----------|
| N=2043                                           | 1235                                          | 610                                                     | 142                                                 | 36                                            | 20                                                   |          |
| currently employed                               | 64.34<br>(60.2,68.5)                          | 51.06<br>(45.1,57.0)                                    | 33.72<br>(22.7,44.7)                                | 56.76<br>(33.5,80.0)                          | 47.34<br>(17.9,76.7)                                 | <.001    |
| N=1179                                           | 780                                           | 318                                                     | 55                                                  | 17                                            | 9                                                    |          |
| Working Hours/week                               | 37.13<br>(35.5,38.7)                          | 37.33<br>(35.4,39.3)                                    | 35.17<br>(31.3,39.1)                                | 47.54<br>(34.8,60.2)                          | 39.05<br>(30.0,48.1)                                 | 0.444    |
| More than one job (yes)                          | 12.35<br>(9.1,15.6)                           | 11.50<br>(6.6,16.4)                                     | 25.52<br>(9.9,41.2)                                 | 8.08<br>(0.0,19.2)                            | 21.43<br>(0.0,52.7)                                  | 0.199    |
| Working Month/year                               | 10.75<br>(10.5,11.0)                          | 10.65<br>(10.2,11.1)                                    | 10.16<br>(9.2,11.1)                                 | 10.53<br>(7.8,13.2)                           | 9.89<br>(8.5,11.3)                                   | 0.568    |
| Working Days/week                                | 4.86<br>(4.7,5.0)                             | 4.90<br>(4.7,5.1)                                       | 4.60<br>(4.2,5.0)                                   | 5.14<br>(4.2,6.1)                             | 4.85<br>(3.9,5.8)                                    | 0.705    |
| Regular work schedule (yes)                      | 69.56<br>(65.2,74.0)                          | 65.88<br>(58.4,73.3)                                    | 67.49<br>(50.9,84.0)                                | 76.16<br>(46.7,100.0)                         | 94.28<br>(82.5,100.0)                                | 0.511    |
| Days (work extra hours)/month                    | 2.45<br>(1.9,3.0)                             | 2.22<br>(1.5,2.9)                                       | 3.95<br>(0.9,7.0)                                   | 1.43<br>(0.0,3.5)                             | 1.81<br>(0.7,3.0)                                    | 0.534    |
| Ever Shift in Current Job (yes)                  | 28.33<br>(23.6,33.1)                          | 25.47<br>(18.8,32.1)                                    | 41.97<br>(27.1,56.8)                                | 57.67<br>(19.9,95.5)                          | 78.04<br>(51.1,100.0)                                | 0.004    |
| Shift $\geq$ 3 day per week in Current Job (yes) | 11.87<br>(9.1,14.7)                           | 11.45<br>(6.3,16.6)                                     | 18.33<br>(4.3,32.4)                                 | 15.02<br>(0.0,32.9)                           | 9.74<br>(0.0,24.8)                                   | 0.799    |
| Hours (home-to-work)                             | 0.15<br>(0.1,0.2)                             | 0.20<br>(0.1,0.3)                                       | 0.27<br>(0.1,0.4)                                   | 0.46<br>(0.0,0.9)                             | 0.53<br>(0.1,1.0)                                    | 0.079    |
| Hours (work-to-home)                             | 0.19<br>(0.2,0.2)                             | 0.23<br>(0.1,0.3)                                       | 0.27<br>(0.1,0.4)                                   | 0.86<br>(0.0,1.7)                             | 0.53<br>(0.1,1.0)                                    | 0.203    |
| N=864                                            | 455                                           | 292                                                     | 87                                                  | 19                                            | 11                                                   |          |
| Homemaker                                        | 44.91<br>(38.4,51.4)                          | 40.65<br>(32.1,49.2)                                    | 33.38<br>(19.8,46.9)                                | 40.44<br>(13.7,67.2)                          | 31.19<br>(0.0,71.5)                                  | 0.603    |
| Student                                          | 11.42<br>(6.6,16.3)                           | 9.67<br>(3.8,15.6)                                      | 12.12<br>(0.6,23.6)                                 | -----                                         | -----                                                | -----    |
| Retired/Disabled                                 | 18.42<br>(14.2,22.6)                          | 21.10<br>(15.0,27.2)                                    | 25.18<br>(11.5,38.8)                                | 27.41<br>(2.1,52.7)                           | 41.05<br>(3.1,79.0)                                  | 0.456    |

Ever shift: ever late night shift (after midnight) or ever early morning shift (start work before 6 am)

## Supplemental References

1. Allen NB, Siddique J, Wilkins JT, Shay C, Lewis CE, Goff DC, Jacobs DR, Liu K, Lloyd-Jones D. Blood pressure trajectories in early adulthood and subclinical atherosclerosis in middle age. *Journal of the American Medical Association*. 2015;311 (5):490-497.
2. Nagin DS, Odgers CL. Group-based Trajectory Modeling in Clinical Research. *The Annual Review of Clinical Psychology*. 2010;6:109-138.
3. van Someren EJW, Hagebeuk EEO, Lijzenga C, Scheltens P, deRooij SEA, Jonker G, Pot AM, Mirmiran M, Swaab DF. Circadian rest-activity rhythm disturbance in Alzheimer's disease. *Biological Psychiatry*. 1996;40 (4):259-270.
